# Supplementary material for: Research on the self-assembly of exfoliated perovskite nanosheets (LaNb2O7−) and cobalt porphyrin utilized for the electrocatalytic oxidation of ascorbic acid
Source: Royal Society of Chemistry journal article supplement (doi:10.1039/c6ra06429a), 2016-01-01
Supplement: c6ra06429a1.pdf [file c6ra06429a1.pdf]

Electronic Supplementary Material (ESI) for RSC Advances.

This journal is © The Royal Society of Chemistry 2016

## Supporting Information

### Research on self-assembly of exfoliated perovskite nanosheets ( $\text{LaNb}_2\text{O}_7$ ) and cobalt porphyrin utilized for electrocatalytic oxidation of ascorbic acid

Binbin Pan <sup>a</sup>, Wenlei Zhao <sup>b</sup>, Xiaobo Zhang <sup>b</sup>, Jinpeng Li <sup>b</sup>, Jiasheng Xu <sup>b</sup>, Juanjuan Ma <sup>b</sup>,  
Lin Liu <sup>b</sup>, Dongen Zhang <sup>b</sup>, and Zhiwei Tong <sup>a, b, c, d,\*1</sup>

<sup>a</sup>School of Chemical Engineering and Technology, China University of Mining and Technology, Xuzhou 221116, China

<sup>b</sup>School of Chemical Engineering, Huaihai Institute of Technology, Lianyungang 222005, China

<sup>c</sup>College of Chemistry and Chemical Engineering, Lanzhou University, Lanzhou 730000, China

<sup>d</sup>SORST, Japan Science and Technology Agency (JST), Kawaguchi Center Building 4-1-8, Kawaguchi-shi, Saitama 332-0012, Japan

### Zeta potential report

#### Results

|                             | Mean (mV)     | Area (%) | St Dev (mV) |
|-----------------------------|---------------|----------|-------------|
| Zeta Potential (mV): -51.9  | Peak 1: -51.9 | 100.0    | 11.5        |
| Zeta Deviation (mV): 11.5   | Peak 2: 0.00  | 0.0      | 0.00        |
| Conductivity (mS/cm): 0.973 | Peak 3: 0.00  | 0.0      | 0.00        |

Result quality **Good**

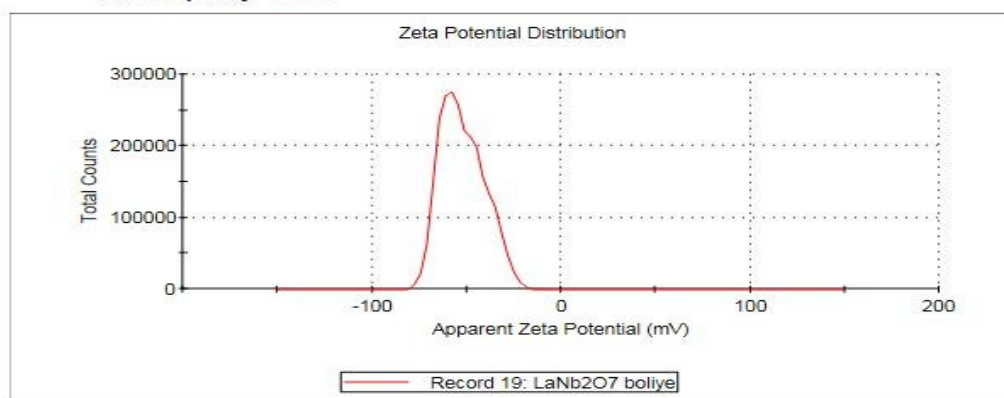

**Fig. S1** The zeta potential report of  $\text{LaNb}_2\text{O}_7$ -nanosheets colloidal dispersion.

<sup>1</sup> \*Corresponding author. E-mail: [zhiweitong575@hotmail.com](mailto:zhiweitong575@hotmail.com), Tel: +0518-85892778
